# Supplementary material
Source: PubMed Central journal article supplement (PMC7249608)
Supplement: NIHMS878074-supplement-Schatz__Valentin_Figures.pdf [file NIHMS878074-supplement-Schatz__Valentin_Figures.pdf]

# Supplemental Fig. 1

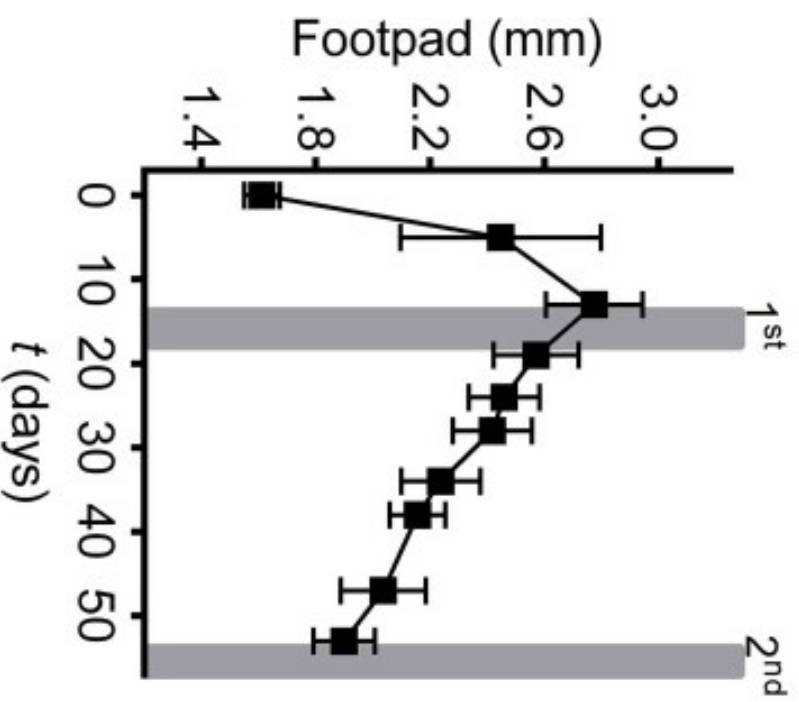

## Supplemental Fig. 1 related to Fig. 1

C57BL/6 mice were infected with *L. major*. Clinical course after cutaneous *L. major* infection (means  $\pm$  SD;  $n \geq 2$ ; a representative out of at least two independent experiments is displayed).

## Supplemental Fig. 2

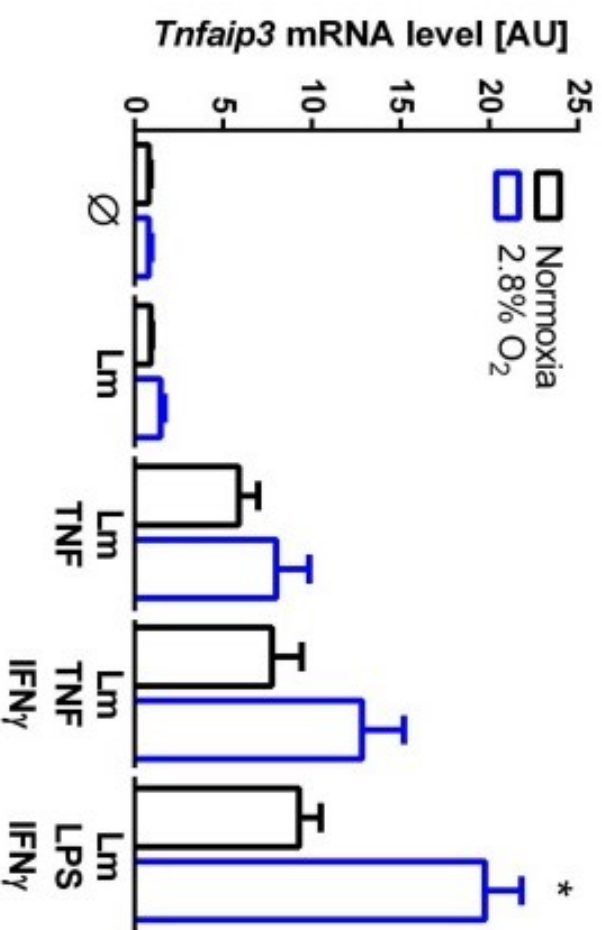

### Supplemental Fig. 2 related to Fig. 2

Macrophages were left untreated (Ø), infected with *L. major* (Lm) and stimulated with TNF (20 ng/ml), TNF/ IFN $\gamma$  (20 ng/ml), LPS (10 ng/ml)/ IFN $\gamma$  under normoxic or 2.8% O<sub>2</sub> conditions. *Tnfaip3* mRNA levels (mean + SEM, n = 7 - 8 from two independent experiments), \**p* (vs. normoxia) < 0.01, Student *t* test or Mann-Whitney *U* test.

# Supplemental Fig. 3

**A**

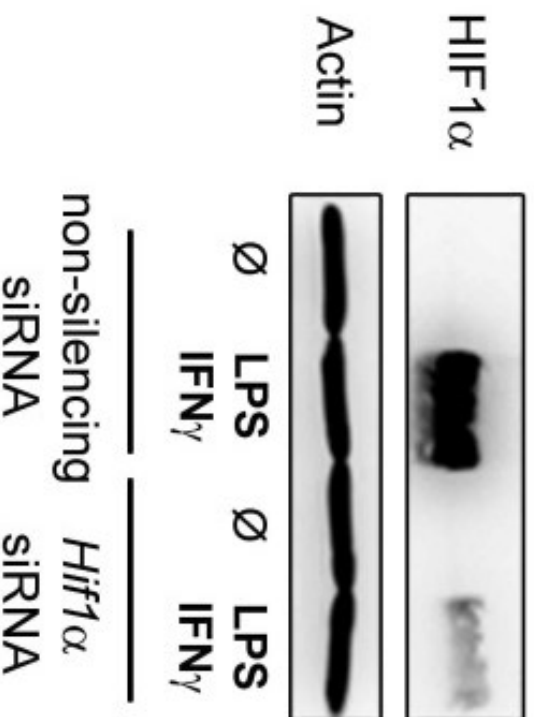

**B**

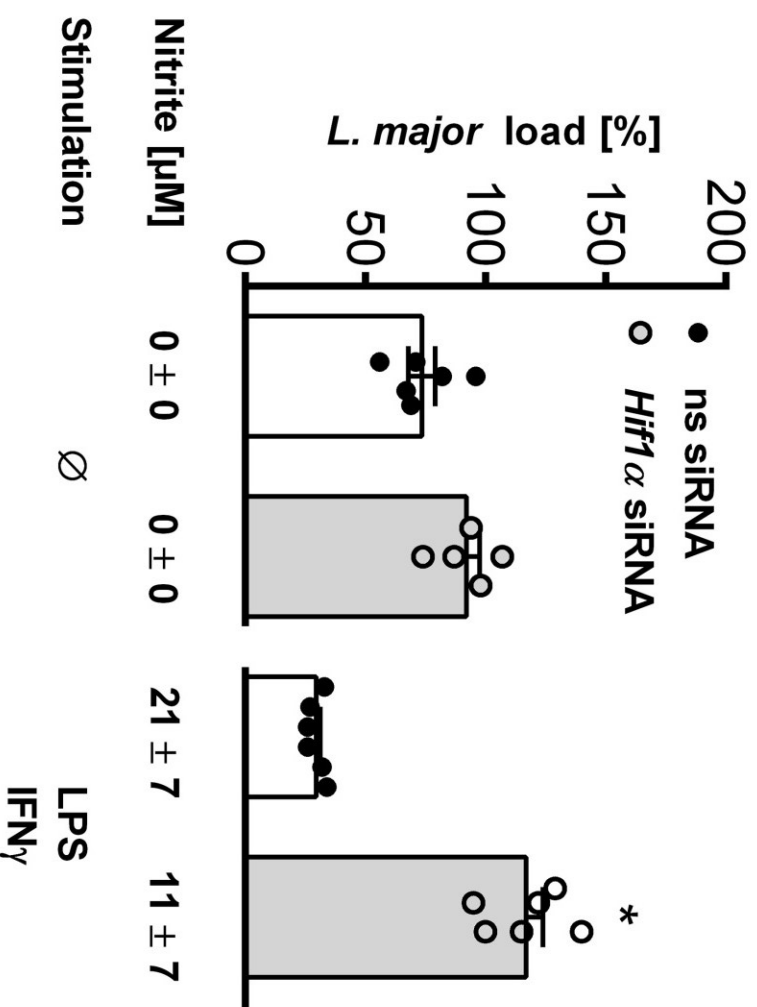

**Supplemental Fig. 3 related to Fig. 4**

(A) Macrophages were electroporated with control non-silencing (ns)-, or *Hif1 $\alpha$* -specific siRNA and subsequently stimulated with LPS (10 ng/ml)/ IFN- $\gamma$  (20 ng/ml) or left unstimulated (Ø) under normoxic conditions. HIF1 $\alpha$  and actin protein levels are represented (a representative of two independent experiments). (B) Macrophages electroporated with control (ns)-, or *Hif1 $\alpha$* -silencing siRNA were infected with *L. major* and stimulated with LPS (10 ng/ml)/ IFN- $\gamma$  (20 ng/ml) or left unstimulated (Ø) under normoxic conditions. Nitrite levels and stimulated with LPS from two independent experiments) and *L. major* load of macrophages (mean  $\pm$  SEM, n = 5 - 6 quantified high power fields from two independent experiments), \**p* (vs. ns) < 0.01, Student *t* test.
